# New Titles from American Psychiatric Association Publishing

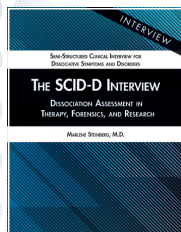

## The SCID-D Interview

*Dissociation Assessment in Therapy, Forensics, and Research*

Marlene Steinberg, M.D.

The SCID-D is an interactive, semi-structured interview for assessing dissociative symptoms and disorders in adults and adolescents based on Dr. Steinberg's innovative Five Component Model of Dissociation Assessment (amnesia, depersonalization, derealization, identity confusion, and identity alteration). The interview has demonstrated a powerful ability to distinguish people with dissociative symptoms and disorders from those with other conditions, and it is widely regarded as the gold standard in the field.

2023 • 194 pages • ISBN 978-1-61537-342-0 • Paperback • \$92.00 • Item #37342

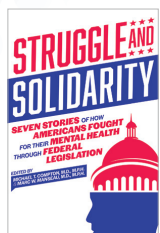

## Struggle and Solidarity

*Seven Stories of How Americans Fought for Their Mental Health Through Federal Legislation*

Edited by Michael T. Compton, M.D., M.P.H., and Marc W. Manseau, M.D., M.P.H.

This book presents seven key pieces of federal legislation and demonstrates how public policies—even when not explicitly mental health-related—can shape social determinants and improve mental health. Taking a case study approach, the authors of the book describe the historical, sociopolitical, and economic contexts for the laws, how the laws came into being, and why they are important, while still making rigorous arguments about the connections between these national policies and mental health.

2023 • 256 pages • ISBN 978-1-61537-238-6 • Paperback • \$59.00 • Item #37238

2023 • 256 pages • ISBN 978-1-61537-405-2 • eBook • \$47.00 • Item #37405

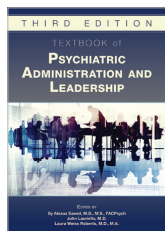

## Textbook of Psychiatric Administration and Leadership, Third Edition

Edited by Sy Saeed, M.D., M.S., FACPsych, John Lauriello, M.D., and Laura Weiss Roberts, M.D., M.A.

This book consolidates the insights of a curated group of experts to both increase the knowledge of young, aspiring leaders and help more established leaders refine their skills. In clear, accessible prose, chapter authors offer evidence-based best practices on topics such as organizational theory, business development and revenue generation, and talent acquisition and management. Throughout, case vignettes help translate the information from page to practice.

Importantly, each subject area is also examined through the lens of the needs and choices of both

2023 • 524 pages • ISBN 978-1-61537-337-6 • Hardcover • \$154.00 • Item #37337

2023 • 524 pages • ISBN 978-1-61537-434-2 • eBook • \$123.00 • Item #37434

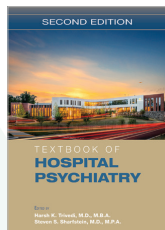

## Textbook of Hospital Psychiatry, Second Edition

Edited by Harsh K. Trivedi, M.D., M.B.A., and Steven S. Sharfstein, M.D., M.P.A.

This updated edition includes new material in each of the chapters, with a focus on treatment, staffing, and quality-of-care changes, and offers new, forward-looking chapters on consumer and family perspectives, collaborative care, safety, and more. Providers and policymakers agree that integrating behavioral treatments into regular courses of patient care helps address postdischarge needs, including safe housing, reliable transportation, and nutrition. Despite the challenges facing clinicians in these unprecedented times, psychiatric hospitals continue to adapt and find ways to provide appropriate care.

2023 • 703 pages • ISBN 978-1-61537-345-1 • Hardcover • \$155.00 • Item #37345

2023 • 703 pages • ISBN 978-1-61537-440-3 • eBook • \$124.00 • Item #37440

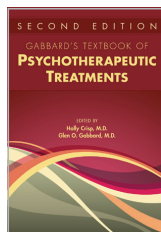

## Gabbard's Textbook of Psychotherapeutic Treatments, Second Edition

Edited by Holly Crisp, M.D., and Glen O. Gabbard, M.D.

This second edition reflects not just advances in psychotherapy—the latest empirical data, as well as an increased understanding of the interface between brain and mind—but also changes in society that have had profound impacts on how therapists practice, including the advancement of LGBTQ+ rights, calls for racial and social justice, and the COVID-19 pandemic. New sections on racial and ethnic diversities and gender and sexualities in psychotherapy accompany an all-new chapter on the expanding role of cyberspace in psychotherapy and another new chapter that discusses the role of supervision and consultation in the training and development of therapists.

2023 • 830 pages • ISBN 978-1-61537-326-0 • Hardcover • \$145.00 • Item #37326

2023 • 830 pages • ISBN 978-1-61537-406-9 • eBook • \$116.00 • Item #37406

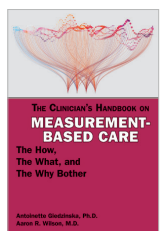

## The Clinician's Handbook on Measurement-Based Care

*The How, the What, and the Why Bother*

Antoinette Giedzinska, Ph.D., and Aaron R. Wilson, M.D.

Discussion and implementation of measurement-based care (MBC) is often beset by misconceptions: it's too time intensive; it's too expensive; it may serve to undermine a practitioner's clinical judgment. This book dispels these and other common myths. In accessible, eminently practical language, it defines MBC for professionals across the spectrum of behavioral health care and human services; delves into research methods, basic statistics, and data management; and even features a compendium of assessments for busy clinicians to reference, listed and organized by mental health concern.

2023 • 164 pages • ISBN 978-1-61537-417-5 • Paperback • \$68.00 • Item #37417

2023 • 164 pages • ISBN 978-1-61537-418-2 • eBook • \$54.00 • Item #37418

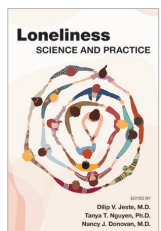

## Loneliness

*Science and Practice*

Edited by Dilip V. Jeste, M.D., Tanya T. Nguyen, Ph.D., and Nancy J. Donovan, M.D.

Offering a comprehensive review of the current literature, this book aims to construct a translational framework for recognizing and addressing loneliness in the clinical context. With clinical vignettes that help ground the information in real-world applicability, this guide presents the theoretical foundations of loneliness; discusses the epidemiology of loneliness throughout the life cycle; examines loneliness in specific populations; analyzes the psychosocial and biological mechanisms of loneliness; and describes research- and community-based interventions.

2023 • 264 pages • ISBN 978-1-61537-422-9 • Paperback • \$53.00 • Item #37422

2023 • 264 pages • ISBN 978-1-61537-423-6 • eBook • \$42.50 • Item #37423

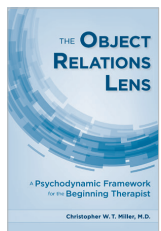

## The Object Relations Lens

*A Psychodynamic Framework for the Beginning Therapist*

Christopher W.T. Miller, M.D.

With a mix of theory, practical advice, and illustrative clinical material, this is a compelling and indispensable resource for any clinician interested in applying the object relations model to their clinical or academic work. As accessible to trainees as it is to experienced clinicians, Dr. Christopher Miller clearly outlines object relations theory, leveraging clinical vignettes to underline the framework's applicability both in therapy and acute care settings.

2023 • 252 pages • ISBN 978-1-61537-428-1 • Paperback • \$52.00 • Item #37428

2023 • 252 pages • ISBN 978-1-61537-429-8 • eBook • \$42.00 • Item #37429

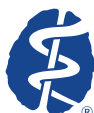

# ▶ PODCASTS from APA Publishing

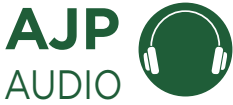

## AJP Audio

Host: Aaron van Dorn

Each episode features an in-depth interview with authors featured in that month's issue of *The American Journal of Psychiatry*.

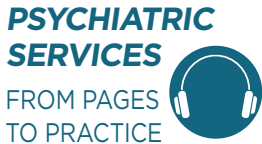

## Psychiatric Services From Pages to Practice

Hosts: Lisa Dixon, M.D., M.P.H., Editor, *Psychiatric Services*, and Josh Berezin, M.D., M.S.

Learn about the latest mental health services research published in *Psychiatric Services* and why it is relevant. Topics include community-based treatment programs, collaborative care, evidence-based treatment and service delivery, criminal and social justice, policy analysis, and more.

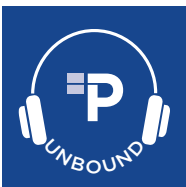

## Psychiatry Unbound

Host: Laura Roberts, M.D., M.A., Editor-in-Chief, APA Publishing Books

APA Publishing's Books podcast offers the opportunity to hear the voices behind the most prominent psychiatric scholarship in the field today. Learn about important topics in the field of psychiatry and see how our authors are making an impact in clinical settings throughout the world.

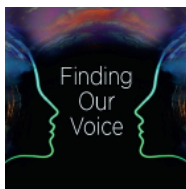

## Finding Our Voice

Host: Sanya Virani, MBBS, MPH

*Finding Our Voice* brings the viewpoints and opinions of the next generation of psychiatrists—including residents, fellows, and early career psychiatrists—to the forefront. Topics covered include systemic racism and social determinants.

Subscribe Today!

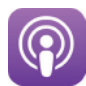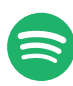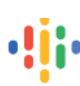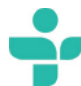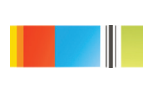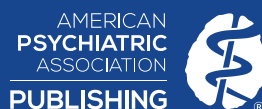

# PSYCHIATRYonline

Your Destination for Lifelong Learning in Psychiatry

The one-stop resource for information on diagnosis, treatment, guidelines, the latest research, and breaking news from the field.

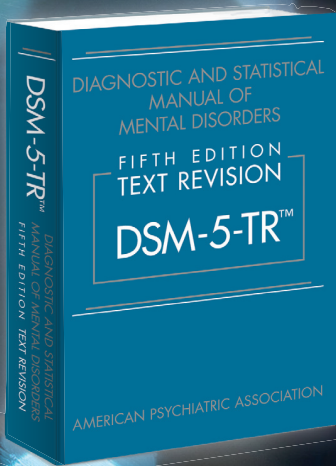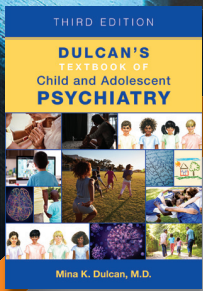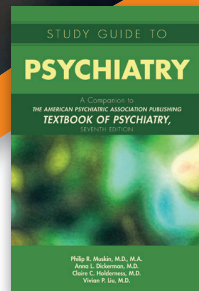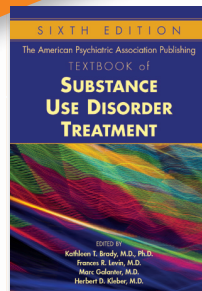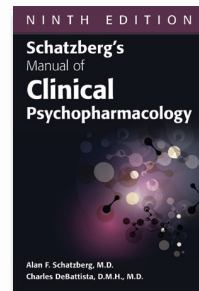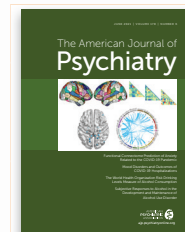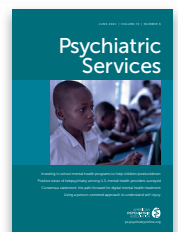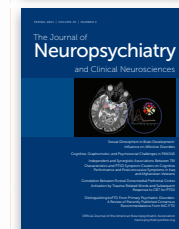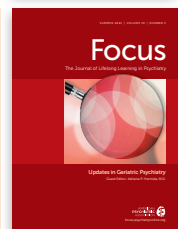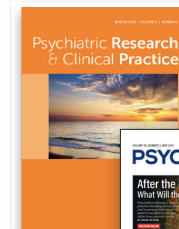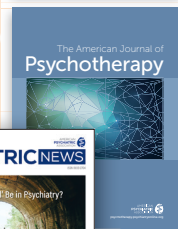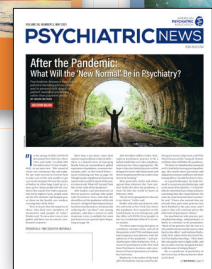

**PsychiatryOnline.org** is the platform for all American Psychiatric Association Publishing journals, *DSM-5-TR™*, and bestselling textbooks, as well as APA Practice Guidelines, and continuing medical education.

This is a one-stop resource for information on psychiatric diagnosis, treatment, guidelines, the latest research, and breaking news from the field. From a single location, users can search across all books and journals to find the most relevant content easier than ever.

Subscribe to products individually or to the DSM Select package that includes the DSM-5® library, books and select journals.

**Go to [www.appi.org](http://www.appi.org) to subscribe.**

*Institutional subscription options are available.*

*For more information contact: [institutions@psych.org](mailto:institutions@psych.org);  
800-368-5777 ext. 3729*
