# Psychiatric Services

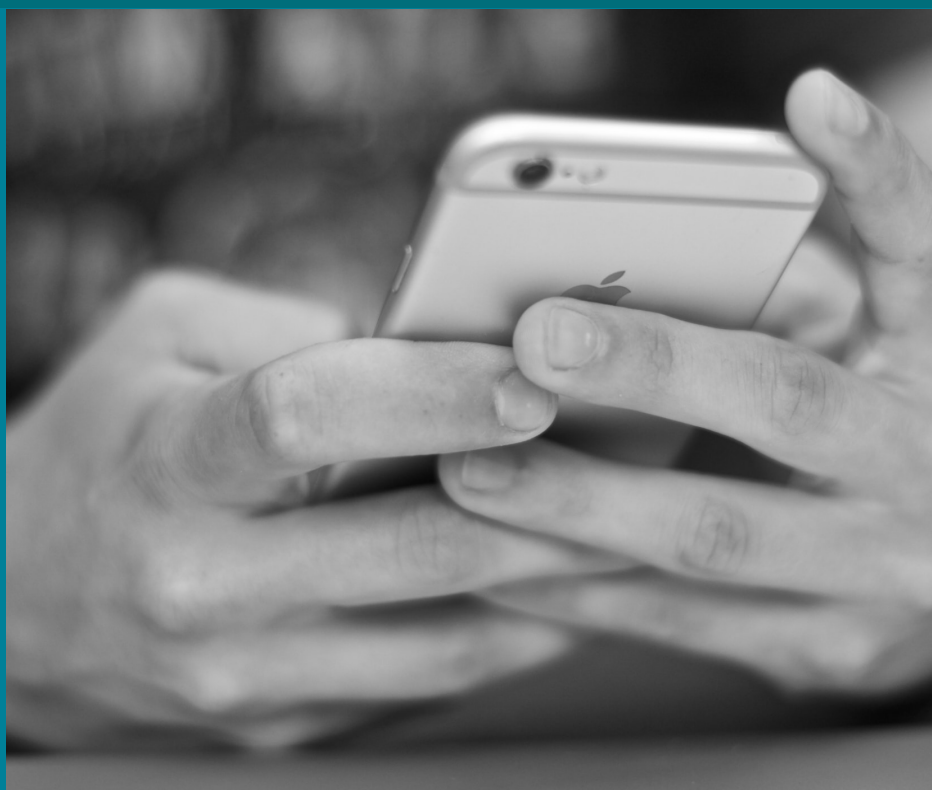

Crisis lines: scoping review (2012–2021) and policy-focused recommendations

Rural-urban disparities in quality of inpatient psychiatric care

Trends in racial-ethnic disparities in adult mental health treatment use, 2005–2019

An RCT on nutrition and exercise for wellness and recovery
